# Supplementary material for: High-accuracy experimental determination of photon mass attenuation coefficients of transition metals and lithium fluoride in the ultra-soft energy range
Source: Royal Society of Chemistry journal article supplement (doi:10.1039/d4cp00500g), 2024-01-01
Supplement: d4cp00500g1.pdf [file d4cp00500g1.pdf]

## Electronic Supplementary Information

### High-accuracy experimental determination of photon mass attenuation coefficients of transition metals and lithium fluoride in the ultra-soft energy range

Pia Schweizer <sup>a,c</sup>, Yves Ménesguen <sup>b</sup>, Marie-Christine Lépy <sup>b</sup>, Emmanuelle Brackx <sup>a</sup>, Maxime Duchateau <sup>a</sup> and Philippe Jonnard <sup>c</sup>

a) CEA/DES/ISEC/DMRC, Université Montpellier, Marcoule, France.

b) Université Paris-Saclay, CEA, LIST, Laboratoire National Henri Becquerel (LNE-LNHB), F-91120, Palaiseau, France.

c) Laboratoire de Chimie Physique—Matière et Rayonnement, Faculté des Sciences et Ingénierie, Sorbonne Université, UMR CNRS, 4 place Jussieu, 75252 Paris Cedex 05, France.

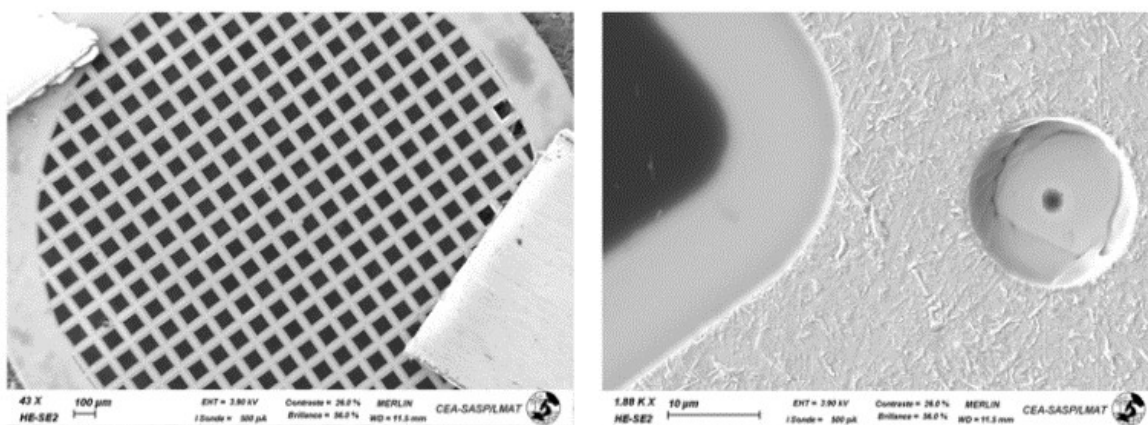

Figure 1 SEM images of a TEM grid covered with a carbon membrane.

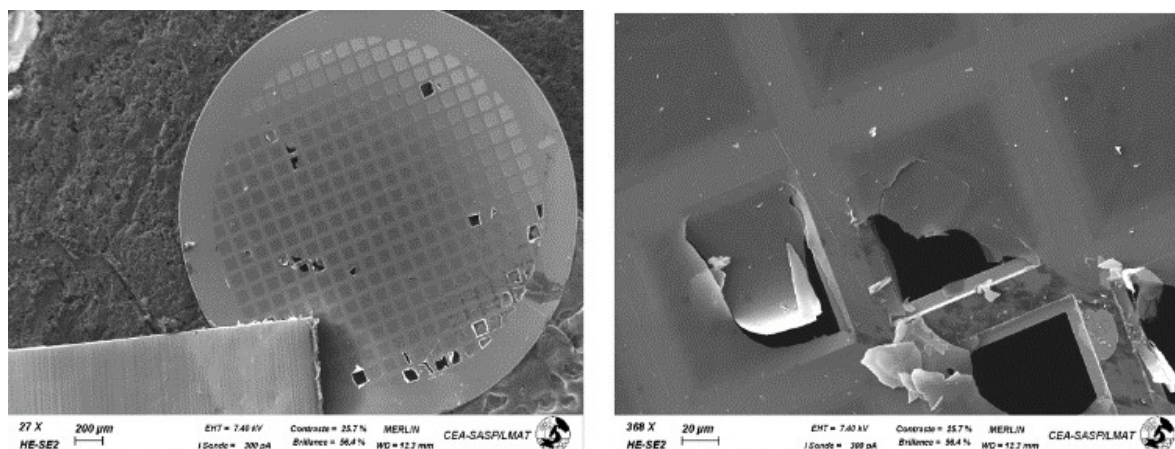

Figure 2 LiF layer of 220 nm on TEM grid (left) and zoom on defects (right).

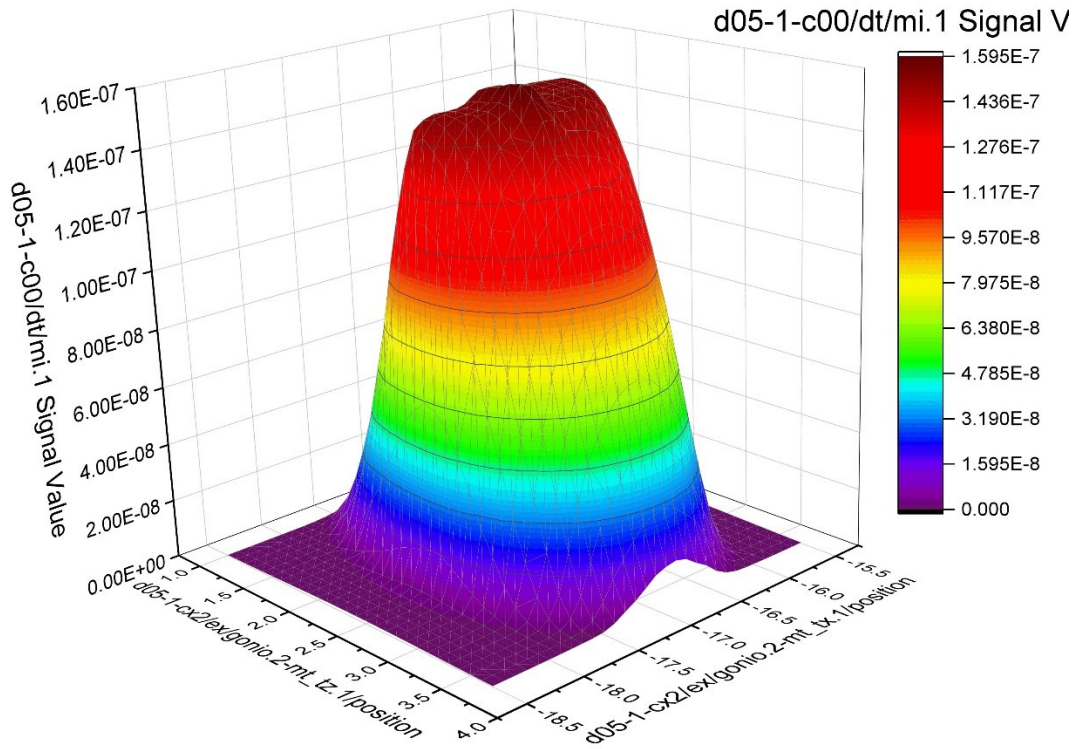

Figure 3 Two-dimensional scan of the transmitted photon intensity through a copper sample.

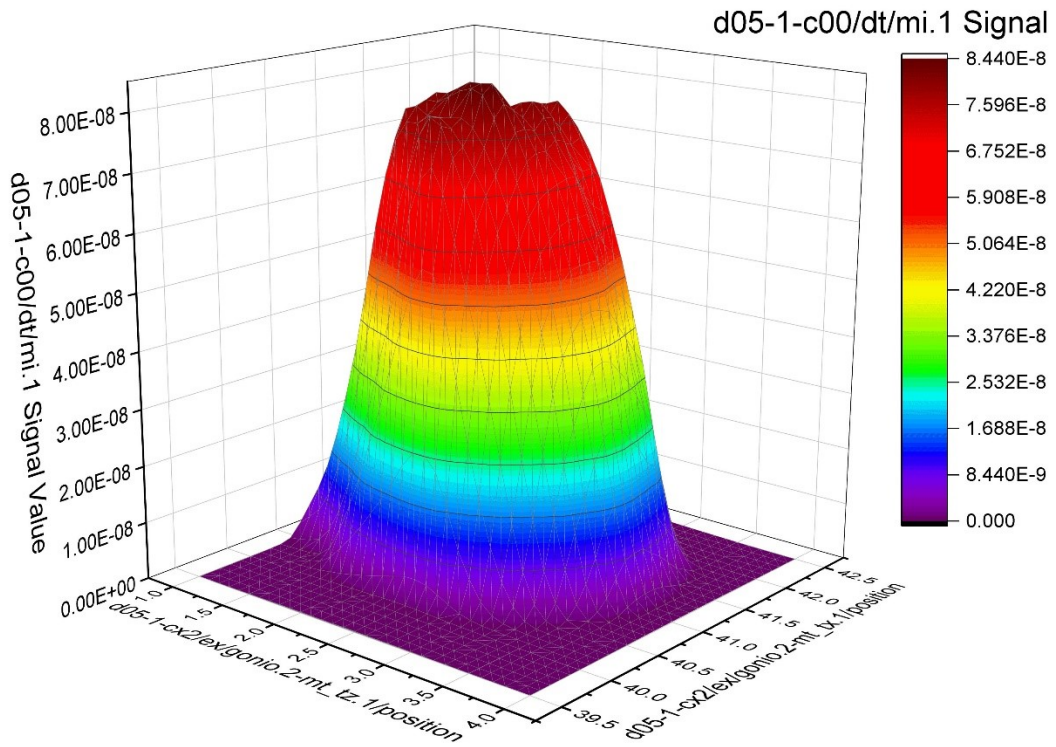

Figure 4 Two-dimensional scan of the transmitted photon intensity through a iron sample.

Table A Fitted parameters and the related standard errors that were used to determine the photon mass attenuation coefficient following equation 2 and the values of the uncertainties following equation 3.

| Element | sample | Fitted parameters      |         |            | Standard error                  |            |            |
|---------|--------|------------------------|---------|------------|---------------------------------|------------|------------|
|         |        | M (g/cm <sup>2</sup> ) | O       | F          | $\sigma_M$ (g/cm <sup>2</sup> ) | $\sigma_O$ | $\sigma_F$ |
| LiF     | 1      | 1.59641 E-5            | 0.41419 | 0          | 4.38912 E-7                     | 0.02336    | 0.04113    |
|         | 2      | 2.24914 E-5            | 0.40842 | 0          | 7.58891 E-7                     | 0.03424    | 0.048      |
|         | 3      | 6.78378 E-5            | 0.23813 | 0          | 8.49796 E-7                     | 0.00476    | 0.00584    |
| Al      | 1      | 1.46848 E-5            | 0.16799 | 0.1531     | 4.65074 E-7                     | 0.02828    | 0.00592    |
|         | 2      | 6.78865 E-5            | 0.29453 | 0.08041    | 1.83607 E-7                     | 0.00146    | 0.00114    |
| Cr      | 1      | 4.21124 E-5            | 0.16799 | 0.1531     | 2.36947 E-6                     | 0.04329    | 0.02899    |
|         | 2      | 1.41995 E-4            | 0.34813 | 0.16451    | 2.42538 E-6                     | 0.01743    | 0.01573    |
| Mn      | 1      | 4.40688 E-5            | 0.11492 | 0.08861    | 2.14032 E-7                     | 0.00217    | 0.00453    |
| Fe      | 1      | 4.33146 E-5            | 0.25797 | 0.11192    | 1.47302 E-7                     | 0.00121    | 0.00186    |
| Co      | 1      | 2.2903 E-5             | 0.14828 | 1 E-6      | 3.15248 E-6                     | 0.00391    | 0.21798    |
| Ni      | 1      | 4.98998 E-5            | 0.19684 | 1 E-4      | 2.94945 E-6                     | 0.13966    | 0.02571    |
|         | 2      | 7.06635 E-5            | 0.18234 | 0.01061    | 2.15407 E-7                     | 0.00132    | 8.2153 E-4 |
| Cu      | 1      | 2.66887 E-5            | 0.18407 | 1 E-8      | 1.68909 E-6                     | 0.12115    | 0.03548    |
|         | 2      | 5.1788 E-5             | 0.13465 | 1 E-8      | 4.29113 E-7                     | 0.01077    | 0.00746    |
|         | 3      | 3.13507 E-4            | 0.07885 | 5.0555 E-5 | 9.7888 E-7                      | 0.0073     | 0.00117    |
